# Supplementary material for: G protein‐coupled oestrogen receptor promotes cell growth of non‐small cell lung cancer cells via YAP1/QKI/circNOTCH1/m6A methylated NOTCH1 signalling
Source: PubMed Central journal article supplement (PMC7810948; doi:10.1111/jcmm.15997), 2020-11-25

Fig. S1

A

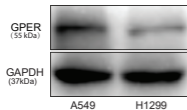

B

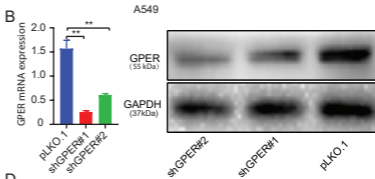

C

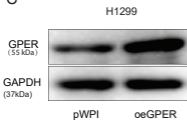

D

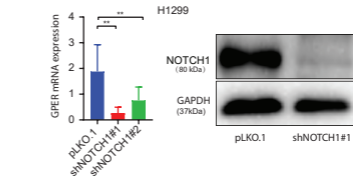

E

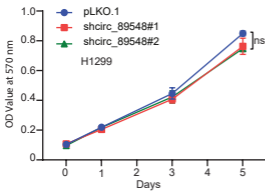

F

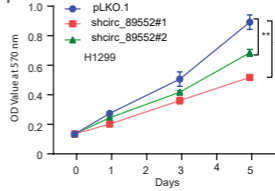

Supplement: JCMM-25-284-s001.pdf [file JCMM-25-284-s001.pdf]
